# Supplementary material for: De novo transcriptome sequencing and analysis of genes related to salt stress response in Glehnia littoralis
Source: PeerJ. 2018 Sep 26;6:e5681. doi: 10.7717/peerj.5681 (PMC6170154; doi:10.7717/peerj.5681)
Supplement: Table S1 [file peerj-06-5681-s001.xlsx]

## Sheet: Sheet1
Table S1 qRT-PCR primers used in this study.
Primer	Sequence
comp29599_c0_seq3-F	GACGGCCTAATTTGTCCACA
comp29599_c0_seq3-R	TTCTTTCAACAGCACTGCCC
comp31311_c0_seq1-F	TTTCGCCAAAGTCTGCAGTC
comp31311_c0_seq1-R	GACGTGATTTCAGTGCCTCC
comp34827_c0_seq47-F	GGAAAACAGGAAGTCGGCTG
comp34827_c0_seq47-R	TCTCAGCCGTCAGACCATTT
comp34313_c0_seq11-F	GGTCGTCCAATCTGCCATAG
comp34313_c0_seq11-R	GGGGATTGAGACGAGGAACA
comp34764_c0_seq3-F	ACCCTATTCGTTGTGGAGCT
comp34764_c0_seq3-R	GGCAATCGTTCGTCTTTGGT
comp30750_c0_seq9-F	GTGAACTGGTTGCGGACATT
comp30750_c0_seq9-R	GCAAACACTGGGGATGACTG
comp35259_c0_seq3-F	TGGGATGGTGAGGTCAAGTC
comp35259_c0_seq3-R	TGAGTTTGGAGACTTTGCGC
comp51216_c0_seq1-F	AATCAGTGCCAAAGTCAGCT
comp51216_c0_seq1-R	ACCAACCTCCTTCGACACAT
comp30817_c0_seq1-F	TGAGCCATTCTGTTCTGTCG
comp30817_c0_seq1-R	GAGCGGCAAGAGGTTAAACA
comp34560_c0_seq12-F	ATTTTGCTCAAGACCGCCTC
comp34560_c0_seq12-R	TTTCTTGCTCGCCTTCAGTC
comp34497_c0_seq1-F	TTTCAATGGTCTCGTCAGCC
comp34497_c0_seq1-R	CTTCCATCCAAATGCCTCGC
comp35064_c0_seq33-F	TTTCACCGGGATCTCAAGCT
comp35064_c0_seq33-R	TGACACCACATGACCACGTA
comp35199_c0_seq4-F	GTCGCGATGGTAAACACCTC
comp35199_c0_seq4-R	TGGCCAGCAAAACCAAGATC
comp33826_c0_seq2-F	TCCCTTGAACCCGCCATTAT
comp33826_c0_seq2-R	ATTCTTTGTGCTCATCCGCC
comp36063_c0_seq23-F	CGAACGGTGTGCTTGAAGAA
comp36063_c0_seq23-R	TGATTTGACTGAAGCCTTCCA
Actin (comp32082_c0_seq1)-F	GTAAGATCACGGCCAGCAAG
Actin (comp32082_c0_seq1)-R	CCATCCAGGCAGTTCTCTCT
