# Supplementary material for: De novo transcriptome sequencing and analysis of genes related to salt stress response in Glehnia littoralis
Source: PeerJ. 2018 Sep 26;6:e5681. doi: 10.7717/peerj.5681 (PMC6170154; doi:10.7717/peerj.5681)
Supplement: Table S2 [file peerj-06-5681-s002.xlsx]

## Sheet: Sheet1
Table S2 Gene ontology (GO) enrichment analysis of unigenes.
Gene Ontology	Class	Number	Percent (%)	GO
molecular_function	electron carrier activity	587	1.24779	GO:0009055
molecular_function	protein binding transcription factor activity	103	0.218949	GO:0000988
molecular_function	binding	24277	51.606	GO:0005488
molecular_function	transporter activity	3241	6.88944	GO:0005215
molecular_function	channel regulator activity	2	0.00425	GO:0016247
molecular_function	protein tag	12	0.0255086	GO:0031386
molecular_function	catalytic activity	26412	56.1444	GO:0003824
molecular_function	metallochaperone activity	17	0.0361372	GO:0016530
molecular_function	nutrient reservoir activity	14	0.02976	GO:0045735
molecular_function	enzyme regulator activity	506	1.07561	GO:0030234
molecular_function	molecular transducer activity	661	1.4051	GO:0060089
molecular_function	structural molecule activity	1005	2.13634	GO:0005198
molecular_function	translation regulator activity	2	0.00425	GO:0045182
molecular_function	nucleic acid binding transcription factor activity	848	1.80261	GO:0001071
molecular_function	receptor activity	336	0.71424	GO:0004872
molecular_function	antioxidant activity	246	0.522926	GO:0016209
cellular_component	extracellular matrix	21	0.04464	GO:0031012
cellular_component	extracellular region part	35	0.0744	GO:0044421
cellular_component	membrane part	5596	11.8955	GO:0044425
cellular_component	cell junction	311	0.661097	GO:0030054
cellular_component	nucleoid	56	0.11904	GO:0009295
cellular_component	cell	23485	49.9224	GO:0005623
cellular_component	synapse part	15	0.0318857	GO:0044456
cellular_component	symplast	278	0.590949	GO:0055044
cellular_component	virion part	12	0.0255086	GO:0044423
cellular_component	organelle	17311	36.7982	GO:0043226
cellular_component	cell part	23483	49.9182	GO:0044464
cellular_component	virion	12	0.0255086	GO:0019012
cellular_component	membrane-enclosed lumen	2418	5.13998	GO:0031974
cellular_component	extracellular region	906	1.9259	GO:0005576
cellular_component	synapse	28	0.05952	GO:0045202
cellular_component	extracellular matrix part	15	0.0318857	GO:0044420
cellular_component	membrane	11722	24.9176	GO:0016020
cellular_component	macromolecular complex	6738	14.3231	GO:0032991
cellular_component	organelle part	7763	16.5019	GO:0044422
biological_process	reproduction	2198	4.67232	GO:0000003
biological_process	multi-organism process	1774	3.77102	GO:0051704
biological_process	developmental process	3930	8.35406	GO:0032502
biological_process	positive regulation of biological process	983	2.08958	GO:0048518
biological_process	multicellular organismal process	4025	8.556	GO:0032501
biological_process	cellular process	28273	60.1003	GO:0009987
biological_process	growth	996	2.11721	GO:0040007
biological_process	single-organism process	14572	30.9759	GO:0044699
biological_process	signaling	2684	5.70542	GO:0023052
biological_process	negative regulation of biological process	925	1.96629	GO:0048519
biological_process	metabolic process	27405	58.2552	GO:0008152
biological_process	biological regulation	8204	17.4394	GO:0065007
biological_process	immune system process	624	1.32645	GO:0002376
biological_process	reproductive process	2008	4.26844	GO:0022414
biological_process	regulation of biological process	7502	15.9471	GO:0050789
biological_process	establishment of localization	5888	12.5162	GO:0051234
biological_process	cellular component organization or biogenesis	4948	10.518	GO:0071840
biological_process	rhythmic process	90	0.191314	GO:0048511
biological_process	cell killing	4	0.0085	GO:0001906
biological_process	response to stimulus	9096	19.3355	GO:0050896
biological_process	biological adhesion	123	0.261463	GO:0022610
biological_process	locomotion	145	0.308229	GO:0040011
biological_process	localization	6058	12.8776	GO:0051179
