# Supplementary material for: De novo transcriptome sequencing and analysis of genes related to salt stress response in Glehnia littoralis
Source: PeerJ. 2018 Sep 26;6:e5681. doi: 10.7717/peerj.5681 (PMC6170154; doi:10.7717/peerj.5681)
Supplement: Table S3 [file peerj-06-5681-s003.xlsx]

## Sheet: Sheet1
Table S3 EuKaryotic Orthologous Groups (KOG) classification of assembled unigenes.
Functional Categories	KOG
[A] RNA processing and modification	1364
[B] Chromatin structure and dynamics	487
[C] Energy production and conversion	1086
[D] Cell cycle control, cell division, chromosome partitioning	702
[E] Amino acid transport and metabolism	975
[F] Nucleotide transport and metabolism	346
[G] Carbohydrate transport and metabolism	1351
[H] Coenzyme transport and metabolism	322
[I] Lipid transport and metabolism	1332
[J] Translation, ribosomal structure and biogenesis	1427
[K] Transcription	1766
[L] Replication, recombination and repair	887
[M] Cell wall/membrane/envelope biogenesis	374
[N] Cell motility	5
[O] Posttranslational modification, protein turnover, chaperones	2630
[P] Inorganic ion transport and metabolism	702
[Q] Secondary metabolites biosynthesis, transport and catabolism	831
[R] General function prediction only	5358
[S] Function unknown	1571
[T] Signal transduction mechanisms	3494
[U] Intracellular trafficking, secretion, and vesicular transport	1414
[V] Defense mechanisms	168
[W] Extracellular structures	70
[Y] Nuclear structure	166
[Z] Cytoskeleton	640
