# Supplementary material for: De novo transcriptome sequencing and analysis of genes related to salt stress response in Glehnia littoralis
Source: PeerJ. 2018 Sep 26;6:e5681. doi: 10.7717/peerj.5681 (PMC6170154; doi:10.7717/peerj.5681)
Supplement: Table S5 [file peerj-06-5681-s005.xlsx]

## Sheet: Sheet1
Table S5 Numbers of annotated genes and expressed features.
All/DEG	Unigene	GO	KEGG	TF
All	105875	47043	53837	1661
DEG	10335	5055	1188	151
DEG, differentially expressed gene; TF, Transcription factor
