# Supplementary material for: De novo transcriptome sequencing and analysis of genes related to salt stress response in Glehnia littoralis
Source: PeerJ. 2018 Sep 26;6:e5681. doi: 10.7717/peerj.5681 (PMC6170154; doi:10.7717/peerj.5681)
Supplement: Table S6 [file peerj-06-5681-s006.xlsx]

## Sheet: Sheet1
Table S6 GO enrichment analysis of differentially expressed genes (DEGs).
Gene Ontology	Class	Number (10335)	Percent (%)	ID
biological_process	maintenance of protein localization in organelle	25	0.241896	GO:0072595
biological_process	maintenance of protein localization in endoplasmic reticulum	24	0.232221	GO:0035437
biological_process	protein retention in ER lumen	24	0.232221	GO:0006621
biological_process	maintenance of protein location in cell	26	0.251572	GO:0032507
biological_process	maintenance of location in cell	26	0.251572	GO:0051651
biological_process	maintenance of protein location	26	0.251572	GO:0045185
biological_process	maintenance of location	26	0.251572	GO:0051235
biological_process	metabolic process	2695	26.0764	GO:0008152
biological_process	nuclear-transcribed mRNA catabolic process, nonsense-mediated decay	12	0.11611	GO:0000184
biological_process	cellular component biogenesis	141	1.3643	GO:0044085
biological_process	single-organism metabolic process	2421	23.4253	GO:0044710
biological_process	lipid X metabolic process	6	0.0580552	GO:2001289
biological_process	embryo development ending in seed dormancy	66	0.638607	GO:0009793
biological_process	barrier septum assembly	18	0.174165	GO:0000917
biological_process	regulation of phosphate metabolic process	34	0.328979	GO:0019220
biological_process	regulation of phosphorus metabolic process	34	0.328979	GO:0051174
biological_process	regulation of protein metabolic process	54	0.522496	GO:0051246
biological_process	cellular process	2715	26.27	GO:0009987
biological_process	response to temperature stimulus	40	0.387034	GO:0009266
biological_process	intracellular protein transmembrane import	2	0.0193517	GO:0044743
biological_process	regulation of cellular protein metabolic process	53	0.512821	GO:0032268
biological_process	ethylene mediated signaling pathway	21	0.203193	GO:0009873
biological_process	negative regulation of metabolic process	12	0.11611	GO:0009892
biological_process	primary metabolic process	2093	20.2516	GO:0044238
biological_process	regulation of macromolecule metabolic process	264	2.55443	GO:0060255
biological_process	response to cold	20	0.193517	GO:0009409
biological_process	regulation of protein modification process	18	0.174165	GO:0031399
biological_process	embryo development	91	0.880503	GO:0009790
biological_process	cellular response to ethylene stimulus	21	0.203193	GO:0071369
biological_process	organ morphogenesis	5	0.0483793	GO:0009887
biological_process	negative regulation of macromolecule metabolic process	11	0.106434	GO:0010605
biological_process	mitochondrial ATP synthesis coupled electron transport	8	0.0774069	GO:0042775
biological_process	ATP synthesis coupled electron transport	8	0.0774069	GO:0042773
biological_process	organic substance metabolic process	2227	21.5481	GO:0071704
biological_process	vegetative to reproductive phase transition of meristem	46	0.44509	GO:0010228
biological_process	DNA recombination	67	0.648283	GO:0006310
biological_process	cytokinetic process	20	0.193517	GO:0032506
biological_process	ribonucleoprotein complex biogenesis	107	1.03532	GO:0022613
biological_process	protein transmembrane transport	3	0.0290276	GO:0071806
biological_process	intracellular protein transmembrane transport	3	0.0290276	GO:0065002
biological_process	regulation of phosphorylation	14	0.135462	GO:0042325
biological_process	ribosome biogenesis	106	1.02564	GO:0042254
biological_process	translation	104	1.00629	GO:0006412
biological_process	cell surface receptor signaling pathway	21	0.203193	GO:0007166
biological_process	amino acid activation	5	0.0483793	GO:0043038
biological_process	tRNA aminoacylation	5	0.0483793	GO:0043039
cellular_component	Holliday junction helicase complex	8	0.0774069	GO:0009379
cellular_component	nuclear part	195	1.88679	GO:0044428
cellular_component	fungal-type cell wall	8	0.0774069	GO:0009277
cellular_component	protein complex	425	4.11224	GO:0043234
cellular_component	intracellular organelle part	651	6.29898	GO:0044446
cellular_component	plastid stroma	35	0.338655	GO:0009532
cellular_component	chloroplast stroma	35	0.338655	GO:0009570
cellular_component	nucleolus	49	0.474117	GO:0005730
cellular_component	organelle part	657	6.35704	GO:0044422
cellular_component	plastid part	136	1.31592	GO:0044435
cellular_component	DNA helicase complex	8	0.0774069	GO:0033202
cellular_component	chloroplast part	136	1.31592	GO:0044434
molecular_function	ER retention sequence binding	24	0.232221	GO:0046923
molecular_function	binding	2641	25.5539	GO:0005488
molecular_function	catalytic activity	2812	27.2085	GO:0003824
molecular_function	signal sequence binding	24	0.232221	GO:0005048
molecular_function	peptide binding	25	0.241896	GO:0042277
molecular_function	organic cyclic compound binding	1794	17.3585	GO:0097159
molecular_function	heterocyclic compound binding	1791	17.3295	GO:1901363
molecular_function	amide binding	25	0.241896	GO:0033218
molecular_function	four-way junction helicase activity	8	0.0774069	GO:0009378
molecular_function	hydrolase activity, acting on glycosyl bonds	155	1.49976	GO:0016798
molecular_function	structural molecule activity	144	1.39332	GO:0005198
molecular_function	1-phosphatidylinositol-4-phosphate 5-kinase activity	19	0.183841	GO:0016308
molecular_function	ATP-dependent 3'-5' DNA helicase activity	8	0.0774069	GO:0043140
molecular_function	3'-5' DNA helicase activity	8	0.0774069	GO:0043138
molecular_function	hydrolase activity, hydrolyzing O-glycosyl compounds	138	1.33527	GO:0004553
molecular_function	calmodulin binding	51	0.493469	GO:0005516
molecular_function	structural constituent of ribosome	106	1.02564	GO:0003735
molecular_function	enzyme regulator activity	24	0.232221	GO:0030234
molecular_function	acyl-[acyl-carrier-protein]-UDP-N-acetylglucosamine O-acyltransferase activity	6	0.0580552	GO:0008780
molecular_function	hydrolase activity	994	9.6178	GO:0016787
molecular_function	glyceraldehyde-3-phosphate dehydrogenase (NAD+) (phosphorylating) activity	9	0.0870827	GO:0004365
