# Supplementary material for: De novo transcriptome sequencing and analysis of genes related to salt stress response in Glehnia littoralis
Source: PeerJ. 2018 Sep 26;6:e5681. doi: 10.7717/peerj.5681 (PMC6170154; doi:10.7717/peerj.5681)
Supplement: Table S7 [file peerj-06-5681-s007.xlsx]

## Sheet: Sheet1
Table S7 KEGG metabolism pathway categories of DEG unigenes.
Level 1	Level 2	Level 3	Pathway ID	DEG number	Background number
A: Metabolism	Amino acid metabolism	Alanine, aspartate and glutamate metabolism	ko00250	20	205
	Amino acid metabolism	Glycine, serine and threonine metabolism	ko00260	18	153
	Amino acid metabolism	Cysteine and methionine metabolism	ko00270	22	306
	Amino acid metabolism	Valine, leucine and isoleucine degradation	ko00280	34	211
	Amino acid metabolism	Valine, leucine and isoleucine biosynthesis	ko00290	7	70
	Amino acid metabolism	Lysine biosynthesis	ko00300	1	36
	Amino acid metabolism	Lysine degradation	ko00310	12	120
	Amino acid metabolism	Arginine and proline metabolism	ko00330	26	241
	Amino acid metabolism	Histidine metabolism	ko00340	8	90
	Amino acid metabolism	Tyrosine metabolism	ko00350	20	133
	Amino acid metabolism	Phenylalanine metabolism	ko00360	20	153
	Amino acid metabolism	Tryptophan metabolism	ko00380	17	127
	Amino acid metabolism	Phenylalanine, tyrosine and tryptophan biosynthesis	ko00400	12	135
	Biosynthesis of other secondary metabolites	Caffeine metabolism	ko00232	1	5
	Biosynthesis of other secondary metabolites	Novobiocin biosynthesis	ko00401	3	30
	Biosynthesis of other secondary metabolites	Streptomycin biosynthesis	ko00521	5	50
	Biosynthesis of other secondary metabolites	Butirosin and neomycin biosynthesis	ko00524	3	22
	Biosynthesis of other secondary metabolites	Phenylpropanoid biosynthesis	ko00940	20	196
	Biosynthesis of other secondary metabolites	Flavonoid biosynthesis	ko00941	10	69
	Biosynthesis of other secondary metabolites	Flavone and flavonol biosynthesis	ko00944	4	16
	Biosynthesis of other secondary metabolites	Stilbenoid, diarylheptanoid and gingerol biosynthesis	ko00945	4	26
	Biosynthesis of other secondary metabolites	Isoquinoline alkaloid biosynthesis	ko00950	8	69
	Biosynthesis of other secondary metabolites	Tropane, piperidine and pyridine alkaloid biosynthesis	ko00960	11	81
	Biosynthesis of other secondary metabolites	Betalain biosynthesis	ko00965	1	6
	Carbohydrate metabolism	Glycolysis / Gluconeogenesis	ko00010	56	469
	Carbohydrate metabolism	Citrate cycle (TCA cycle)	ko00020	27	247
	Carbohydrate metabolism	Pentose phosphate pathway	ko00030	27	196
	Carbohydrate metabolism	Pentose and glucuronate interconversions	ko00040	33	258
	Carbohydrate metabolism	Fructose and mannose metabolism	ko00051	23	182
	Carbohydrate metabolism	Galactose metabolism	ko00052	28	192
	Carbohydrate metabolism	Ascorbate and aldarate metabolism	ko00053	21	159
	Carbohydrate metabolism	Starch and sucrose metabolism	ko00500	59	520
	Carbohydrate metabolism	Amino sugar and nucleotide sugar metabolism	ko00520	42	351
	Carbohydrate metabolism	Inositol phosphate metabolism	ko00562	39	274
	Carbohydrate metabolism	Pyruvate metabolism	ko00620	30	324
	Carbohydrate metabolism	Glyoxylate and dicarboxylate metabolism	ko00630	27	171
	Carbohydrate metabolism	Propanoate metabolism	ko00640	25	210
	Carbohydrate metabolism	Butanoate metabolism	ko00650	15	89
	Energy metabolism	Oxidative phosphorylation	ko00190	48	501
	Energy metabolism	Photosynthesis	ko00195	18	114
	Energy metabolism	Photosynthesis - antenna proteins	ko00196	1	29
	Energy metabolism	Methane metabolism	ko00680	38	294
	Energy metabolism	Carbon fixation in photosynthetic organisms	ko00710	19	254
	Energy metabolism	Carbon fixation pathways in prokaryotes	ko00720	17	123
	Energy metabolism	Nitrogen metabolism	ko00910	13	96
	Energy metabolism	Sulfur metabolism	ko00920	5	79
	Glycan biosynthesis and metabolism	N-Glycan biosynthesis	ko00510	22	202
	Glycan biosynthesis and metabolism	Other glycan degradation	ko00511	10	58
	Glycan biosynthesis and metabolism	Various types of N-glycan biosynthesis	ko00513	7	133
	Glycan biosynthesis and metabolism	Glycosaminoglycan degradation	ko00531	1	28
	Glycan biosynthesis and metabolism	Lipopolysaccharide biosynthesis	ko00540	19	83
	Glycan biosynthesis and metabolism	Glycosylphosphatidylinositol(GPI)-anchor biosynthesis	ko00563	1	133
	Glycan biosynthesis and metabolism	Glycosphingolipid biosynthesis - globo series	ko00603	4	19
	Glycan biosynthesis and metabolism	Glycosphingolipid biosynthesis - ganglio series	ko00604	1	15
	Lipid metabolism	Fatty acid biosynthesis	ko00061	9	132
	Lipid metabolism	Fatty acid elongation	ko00062	7	47
	Lipid metabolism	Fatty acid metabolism	ko00071	33	271
	Lipid metabolism	Synthesis and degradation of ketone bodies	ko00072	4	23
	Lipid metabolism	Cutin, suberine and wax biosynthesis	ko00073	3	48
	Lipid metabolism	Steroid biosynthesis	ko00100	14	77
	Lipid metabolism	Primary bile acid biosynthesis	ko00120	4	8
	Lipid metabolism	Steroid hormone biosynthesis	ko00140	3	8
	Lipid metabolism	Glycerolipid metabolism	ko00561	25	251
	Lipid metabolism	Glycerophospholipid metabolism	ko00564	34	358
	Lipid metabolism	Ether lipid metabolism	ko00565	17	142
	Lipid metabolism	Arachidonic acid metabolism	ko00590	9	69
	Lipid metabolism	Linoleic acid metabolism	ko00591	7	64
	Lipid metabolism	alpha-Linolenic acid metabolism	ko00592	7	115
	Lipid metabolism	Sphingolipid metabolism	ko00600	32	179
	Lipid metabolism	Biosynthesis of unsaturated fatty acids	ko01040	11	134
	Metabolism of cofactors and vitamins	Ubiquinone and other terpenoid-quinone biosynthesis	ko00130	23	156
	Metabolism of cofactors and vitamins	One carbon pool by folate	ko00670	7	47
	Metabolism of cofactors and vitamins	Thiamine metabolism	ko00730	2	28
	Metabolism of cofactors and vitamins	Riboflavin metabolism	ko00740	3	40
	Metabolism of cofactors and vitamins	Nicotinate and nicotinamide metabolism	ko00760	7	51
	Metabolism of cofactors and vitamins	Pantothenate and CoA biosynthesis	ko00770	24	186
	Metabolism of cofactors and vitamins	Lipoic acid metabolism	ko00785	3	16
	Metabolism of cofactors and vitamins	Folate biosynthesis	ko00790	11	65
	Metabolism of cofactors and vitamins	Retinol metabolism	ko00830	10	45
	Metabolism of cofactors and vitamins	Porphyrin and chlorophyll metabolism	ko00860	4	101
	Metabolism of other amino acids	beta-Alanine metabolism	ko00410	19	168
	Metabolism of other amino acids	Taurine and hypotaurine metabolism	ko00430	10	59
	Metabolism of other amino acids	Phosphonate and phosphinate metabolism	ko00440	4	31
	Metabolism of other amino acids	Selenocompound metabolism	ko00450	3	65
	Metabolism of other amino acids	Cyanoamino acid metabolism	ko00460	13	107
	Metabolism of other amino acids	D-Glutamine and D-glutamate metabolism	ko00471	1	10
	Metabolism of other amino acids	Glutathione metabolism	ko00480	28	232
	Metabolism of terpenoids and polyketides	Tetracycline biosynthesis	ko00253	5	37
	Metabolism of terpenoids and polyketides	Geraniol degradation	ko00281	3	20
	Metabolism of terpenoids and polyketides	Terpenoid backbone biosynthesis	ko00900	18	118
	Metabolism of terpenoids and polyketides	Monoterpenoid biosynthesis	ko00902	2	10
	Metabolism of terpenoids and polyketides	Limonene and pinene degradation	ko00903	9	71
	Metabolism of terpenoids and polyketides	Carotenoid biosynthesis	ko00906	13	126
	Metabolism of terpenoids and polyketides	Zeatin biosynthesis	ko00908	5	49
	Metabolism of terpenoids and polyketides	Sesquiterpenoid and triterpenoid biosynthesis	ko00909	12	64
	Metabolism of terpenoids and polyketides	Biosynthesis of siderophore group nonribosomal peptides	ko01053	8	29
	Nucleotide metabolism	Purine metabolism	ko00230	49	512
	Nucleotide metabolism	Pyrimidine metabolism	ko00240	37	390
	Xenobiotics biodegradation and metabolism	Benzoate degradation	ko00362	8	32
	Xenobiotics biodegradation and metabolism	Bisphenol degradation	ko00363	4	20
	Xenobiotics biodegradation and metabolism	Polycyclic aromatic hydrocarbon degradation	ko00624	1	14
	Xenobiotics biodegradation and metabolism	Chloroalkane and chloroalkene degradation	ko00625	15	87
	Xenobiotics biodegradation and metabolism	Naphthalene degradation	ko00626	7	30
	Xenobiotics biodegradation and metabolism	Aminobenzoate degradation	ko00627	7	35
	Xenobiotics biodegradation and metabolism	Ethylbenzene degradation	ko00642	1	5
	Xenobiotics biodegradation and metabolism	Caprolactam degradation	ko00930	5	15
	Xenobiotics biodegradation and metabolism	Metabolism of xenobiotics by cytochrome P450	ko00980	24	105
	Xenobiotics biodegradation and metabolism	Drug metabolism - cytochrome P450	ko00982	23	106
	Xenobiotics biodegradation and metabolism	Drug metabolism - other enzymes	ko00983	8	60
B: Genetic Information Processing	Transcription	RNA polymerase	ko03020	8	121
	Transcription	Basal transcription factors	ko03022	14	157
	Transcription	Spliceosome	ko03040	67	766
	Translation	Aminoacyl-tRNA biosynthesis	ko00970	7	195
	Translation	Ribosome biogenesis in eukaryotes	ko03008	48	413
	Translation	Ribosome	ko03010	123	692
	Translation	RNA transport	ko03013	45	561
	Translation	mRNA surveillance pathway	ko03015	42	653
	Folding, sorting and degradation	RNA degradation	ko03018	18	340
	Folding, sorting and degradation	Proteasome	ko03050	7	149
	Folding, sorting and degradation	Protein export	ko03060	23	209
	Folding, sorting and degradation	Ubiquitin mediated proteolysis	ko04120	36	481
	Folding, sorting and degradation	Sulfur relay system	ko04122	3	91
	Folding, sorting and degradation	SNARE interactions in vesicular transport	ko04130	5	81
	Folding, sorting and degradation	Protein processing in endoplasmic reticulum	ko04141	53	615
	Replication and repair	DNA replication	ko03030	29	196
	Replication and repair	Base excision repair	ko03410	20	137
	Replication and repair	Nucleotide excision repair	ko03420	32	257
	Replication and repair	Mismatch repair	ko03430	26	160
	Replication and repair	Homologous recombination	ko03440	24	174
	Replication and repair	Non-homologous end-joining	ko03450	4	61
	Replication and repair	Fanconi anemia pathway	ko03460	27	274
C: Environmental Information Processing	Membrane transport	ABC transporters	ko02010	6	75
	Membrane transport	Bacterial secretion system	ko03070	14	97
	Signal transduction	Two-component system	ko02020	8	34
	Signal transduction	MAPK signaling pathway	ko04010	21	224
	Signal transduction	MAPK signaling pathway - yeast	ko04011	1	30
	Signal transduction	ErbB signaling pathway	ko04012	4	81
	Signal transduction	Calcium signaling pathway	ko04020	30	192
	Signal transduction	Phosphatidylinositol signaling system	ko04070	26	228
	Signal transduction	Plant hormone signal transduction	ko04075	34	524
	Signal transduction	mTOR signaling pathway	ko04150	10	128
	Signal transduction	Wnt signaling pathway	ko04310	24	309
	Signal transduction	Hedgehog signaling pathway	ko04340	8	74
	Signal transduction	TGF-beta signaling pathway	ko04350	10	127
	Signal transduction	VEGF signaling pathway	ko04370	13	108
	Signaling molecules and interaction	Neuroactive ligand-receptor interaction	ko04080	1	20
	Signaling molecules and interaction	ECM-receptor interaction	ko04512	1	22
D: Cellular Processes	Transport and catabolism	Lysosome	ko04142	73	482
	Transport and catabolism	Endocytosis	ko04144	53	484
	Transport and catabolism	Phagosome	ko04145	24	260
	Transport and catabolism	Peroxisome	ko04146	41	353
	Cell growth and death	Cell cycle	ko04110	39	522
	Cell growth and death	Cell cycle - yeast	ko04111	35	461
	Cell growth and death	Cell cycle - Caulobacter	ko04112	2	26
	Cell growth and death	Meiosis - yeast	ko04113	19	393
	Cell growth and death	Oocyte meiosis	ko04114	34	438
	Cell growth and death	p53 signaling pathway	ko04115	14	160
	Cell growth and death	Apoptosis	ko04210	24	110
	Cell motility	Regulation of actin cytoskeleton	ko04810	33	283
	Cellular community - eukaryotes	Focal adhesion	ko04510	4	166
	Cellular community - eukaryotes	Adherens junction	ko04520	3	124
	Cellular community - eukaryotes	Tight junction	ko04530	11	213
	Cellular community - eukaryotes	Gap junction	ko04540	3	94
E: Organismal Systems	Immune system	Chemokine signaling pathway	ko04062	1	88
	Immune system	Antigen processing and presentation	ko04612	24	191
	Immune system	Toll-like receptor signaling pathway	ko04620	2	56
	Immune system	RIG-I-like receptor signaling pathway	ko04622	8	108
	Immune system	Cytosolic DNA-sensing pathway	ko04623	2	47
	Immune system	Hematopoietic cell lineage	ko04640	1	7
	Immune system	Natural killer cell mediated cytotoxicity	ko04650	11	92
	Immune system	T cell receptor signaling pathway	ko04660	12	93
	Immune system	B cell receptor signaling pathway	ko04662	11	95
	Immune system	Fc gamma R-mediated phagocytosis	ko04666	38	268
	Immune system	Leukocyte transendothelial migration	ko04670	3	63
	Environmental adaptation	Plant-pathogen interaction	ko04626	46	453
	Environmental adaptation	Circadian rhythm - mammal	ko04710	8	61
	Environmental adaptation	Circadian rhythm - fly	ko04711	3	30
	Environmental adaptation	Circadian rhythm - plant	ko04712	4	101
