# Supplementary material for: De novo transcriptome sequencing and analysis of genes related to salt stress response in Glehnia littoralis
Source: PeerJ. 2018 Sep 26;6:e5681. doi: 10.7717/peerj.5681 (PMC6170154; doi:10.7717/peerj.5681)
Supplement: Table S8 [file peerj-06-5681-s008.xlsx]

## Sheet: Sheet1
Table S8 DEGs information in secondary metabolism pathways shown in heat map analysis.
Unigene ID	NR tophit name	Description
comp35259_c0_seq3	gi|116486991|emb|CAJ40778.1|	hydroxycinnamoyl transferase
comp35259_c0_seq2	gi|116486991|emb|CAJ40778.1|	hydroxycinnamoyl transferase
comp25625_c0_seq1	gi|224076226|ref|XP_002304909.1|	predicted protein [Populus unknown
comp33366_c0_seq4	gi|462411817|gb|EMJ16866.1|	hypothetical protein PRUPE_ppa008577mg
comp8075_c0_seq1	gi|25140434|gb|AAN71761.1|	cinnamoyl CoA reductase
comp451243_c0_seq1	gi|169621263|ref|XP_001804042.1|	hypothetical protein SNOG_13840
comp109980_c0_seq1	gi|242040909|ref|XP_002467849.1|	hypothetical protein SORBIDRAFT_01g035150
comp24846_c0_seq1	gi|508706940|gb|EOX98836.1|	Peroxidase N1
comp25625_c0_seq2	gi|224076226|ref|XP_002304909.1|	predicted protein
comp51216_c0_seq1	gi|460411414|ref|XP_004251107.1|	PREDICTED: 4-coumarate--CoA ligase-like 7-like
comp31576_c0_seq1	gi|508720960|gb|EOY12857.1|	Beta-glucosidase 45, putative
comp31576_c0_seq7	gi|508720960|gb|EOY12857.1|	Beta-glucosidase 45, putative
comp31576_c0_seq16	gi|508720960|gb|EOY12857.1|	Beta-glucosidase 45, putative
comp31576_c0_seq19	gi|508720960|gb|EOY12857.1|	Beta-glucosidase 45, putative
comp3140_c0_seq1	gi|225444399|ref|XP_002268360.1|	PREDICTED: peroxidase 27 isoform 1
comp114043_c0_seq1	gi|485928273|gb|EOD52009.1|	putative beta-d-glucoside glucohydrolase protein
comp203348_c0_seq1	gi|462402508|gb|EMJ08065.1|	hypothetical protein PRUPE_ppb006944mg
comp28562_c0_seq2	gi|218138216|gb|ACK57683.1|	peroxidase
comp11328_c0_seq1	gi|225626273|gb|ACN97186.1|	peroxidase
comp31785_c0_seq7	gi|28629828|gb|AAO45182.1|	peroxidase
comp31406_c0_seq2	gi|224102385|ref|XP_002312659.1|	cytochrome P450 [Populus cytochrome P450
comp35259_c0_seq2	gi|116486991|emb|CAJ40778.1|	hydroxycinnamoyl transferase
comp35259_c0_seq3	gi|116486991|emb|CAJ40778.1|	hydroxycinnamoyl transferase
comp109980_c0_seq1	gi|242040909|ref|XP_002467849.1|	hypothetical protein SORBIDRAFT_01g035150
comp31351_c0_seq2	gi|302141846|emb|CBI19049.3|	unnamed protein product
comp31351_c0_seq21	gi|302141846|emb|CBI19049.3|	unnamed protein product
comp31351_c0_seq23	gi|449527913|ref|XP_004170952.1|	PREDICTED: LOW QUALITY PROTEIN: flavonol synthase/flavanone 3-hydroxylase-like
comp31351_c0_seq27	gi|449527913|ref|XP_004170952.1|	PREDICTED: LOW QUALITY PROTEIN: flavonol synthase/flavanone 3-hydroxylase-like
comp31351_c0_seq7	gi|302141846|emb|CBI19049.3|	unnamed protein product
comp31351_c0_seq12	gi|449527913|ref|XP_004170952.1|	PREDICTED: LOW QUALITY PROTEIN: flavonol synthase/flavanone 3-hydroxylase-like
comp35259_c0_seq1	gi|407032662|gb|AFS68800.1|	hydroxycinnamoyl transferase
comp35259_c0_seq2	gi|116486991|emb|CAJ40778.1|	hydroxycinnamoyl transferase
comp35259_c1_seq12	gi|225430293|ref|XP_002282677.1|	PREDICTED: putative L-ascorbate peroxidase 6
comp109980_c0_seq1	gi|242040909|ref|XP_002467849.1|	hypothetical protein SORBIDRAFT_01g035150
comp33428_c0_seq1	gi|297792845|ref|XP_002864307.1|	O-methyltransferase 1
comp22400_c0_seq2	gi|29839361|sp|Q8LL87.1|COMT1_COFCA	RecName: Full=Caffeic acid 3-O-methyltransferase
comp8106_c0_seq1	gi|38565547|gb|AAR24095.1|	caffeic acid O-methyltransferase-like protein
comp112162_c0_seq1	gi|38565547|gb|AAR24095.1|	caffeic acid O-methyltransferase-like protein
comp7758_c0_seq2	gi|225446437|ref|XP_002276551.1|	PREDICTED: tyrosine aminotransferase
comp35144_c0_seq30	gi|224135921|ref|XP_002322194.1|	predicted protein [Populus predicted protein
comp288068_c0_seq1	gi|332373578|gb|AEE61930.1|	unknown [Dendroctonus ponderosae]
comp32300_c0_seq3	gi|474346170|gb|EMS62834.1|	Aspartate aminotransferase
comp11741_c0_seq2	gi|508707599|gb|EOX99495.1|	Tyrosine transaminase family protein isoform 1
comp35144_c0_seq41	gi|224135921|ref|XP_002322194.1|	predicted protein [Populus predicted protein
comp35575_c0_seq8	gi|242071353|ref|XP_002450953.1|	hypothetical protein SORBIDRAFT_05g021610
comp35144_c0_seq11	gi|224135921|ref|XP_002322194.1|	predicted protein [Populus predicted protein
comp188582_c0_seq1	gi|169610467|ref|XP_001798652.1|	hypothetical protein SNOG_08332
comp288068_c0_seq1	gi|332373578|gb|AEE61930.1|	unknown
comp12305_c0_seq1	gi|211906442|gb|ACJ11714.1|	Myo-inositol-1-phosphate synthase
comp25858_c0_seq8	gi|462411935|gb|EMJ16984.1|	hypothetical protein PRUPE_ppa009797mg
comp160218_c0_seq1	gi|407927450|gb|EKG20343.1|	Alpha-D-phosphohexomutase superfamily
comp34724_c0_seq3	gi|391347294|ref|XP_003747899.1|	PREDICTED: hexokinase-2-like
comp25858_c0_seq5	gi|462411935|gb|EMJ16984.1|	hypothetical protein PRUPE_ppa009797mg
comp25858_c0_seq8	gi|462411935|gb|EMJ16984.1|	hypothetical protein PRUPE_ppa009797mg
comp34724_c0_seq3	gi|391347294|ref|XP_003747899.1|	PREDICTED: hexokinase-2-like
comp25858_c0_seq5	gi|462411935|gb|EMJ16984.1|	hypothetical protein PRUPE_ppa009797mg
comp7758_c0_seq2	gi|225446437|ref|XP_002276551.1|	PREDICTED: tyrosine aminotransferase
comp11741_c0_seq2	gi|508707599|gb|EOX99495.1|	Tyrosine transaminase family protein isoform 1
comp35575_c0_seq8	gi|242071353|ref|XP_002450953.1|	hypothetical protein SORBIDRAFT_05g021610
comp7758_c0_seq2	gi|225446437|ref|XP_002276551.1|	PREDICTED: tyrosine aminotransferase
comp39966_c0_seq1	gi|18138053|emb|CAD20555.1|	tropinone reductase I
comp35144_c0_seq30	gi|224135921|ref|XP_002322194.1|	predicted protein
comp32300_c0_seq3	gi|474346170|gb|EMS62834.1|	Aspartate aminotransferase
comp11741_c0_seq2	gi|508707599|gb|EOX99495.1|	Tyrosine transaminase family protein isoform 1
comp35144_c0_seq41	gi|224135921|ref|XP_002322194.1|	predicted protein [Populus predicted protein
comp28572_c0_seq1	gi|224087453|ref|XP_002308173.1|	predicted protein [Populus predicted protein
comp32759_c0_seq4	gi|1717755|sp|P50165.1|TRNH_DATST	RecName: Full=Tropinone reductase homolog
comp25484_c0_seq2	gi|225434839|ref|XP_002282638.1|	PREDICTED: tropinone reductase homolog At1g07440
comp35144_c0_seq11	gi|224135921|ref|XP_002322194.1|	predicted protein [Populus predicted protein
comp35575_c0_seq8	gi|242071353|ref|XP_002450953.1|	hypothetical protein SORBIDRAFT_05g021610
